# Supplementary material for: Low-Attenuation Noncalcified Plaque on Coronary Computed Tomography Angiography Predicts Myocardial Infarction: Results From the Multicenter SCOT-HEART Trial (Scottish Computed Tomography of the HEART)
Source: PubMed Central journal article supplement (PMC7195857; doi:10.1161/circulationaha.119.044720), 2020-03-16
Supplement: cir-141-1452-s001.pdf [file cir-141-1452-s001.pdf]

## **SUPPLEMENTAL MATERIAL**

## Supplemental Tables

*Supplemental Table 1: Quantitative plaque burden in patients 1, 2 and 3 or more vessels of obstructive coronary artery disease.*

|                                   | <b>No vessels<br/>with<br/>obstructive<br/>CAD</b> | <b>1-Vessel<br/>obstructive<br/>CAD</b> | <b>2-Vessel<br/>obstructive<br/>CAD</b> | <b>3-Vessel<br/>obstructive<br/>CAD</b> | <b>P</b>         |
|-----------------------------------|----------------------------------------------------|-----------------------------------------|-----------------------------------------|-----------------------------------------|------------------|
| Plaque burden (%)                 | 26 [0 to 44]                                       | 48 [43 to 55]                           | 51 [45 to 58]                           | 52 [47 to 58]                           | <b>&lt;0.001</b> |
| Non-calcified plaque burden (%)   | 24 [0 to 42]                                       | 44 [39 to 50]                           | 45 [38 to 52]                           | 46 [39 to 49]                           | <b>&lt;0.001</b> |
| Low-attenuation plaque burden (%) | 1.5 [0 to 5.8]                                     | 6.4 [4.7 to 8.6]                        | 7.2 [5.4 to 8.8]                        | 7.7 [6.0 to 9.5]                        | <b>&lt;0.001</b> |
| Calcified plaque burden (%)       | 0 [0 to 1.2]                                       | 2.3 [0.8 to 5.7]                        | 4.4 [2.1 to 7.5]                        | 6.1 [3.4 to 11.3]                       | <b>&lt;0.001</b> |

*Median [interquartile range].*

*CAD, coronary artery disease.*

*Supplemental Table 2: Univariable analysis for plaque subtypes and the primary end-point of fatal or non-fatal myocardial infarction.*

|                                | No Event      | Event            | Univariable                  |                  |
|--------------------------------|---------------|------------------|------------------------------|------------------|
|                                |               |                  | Hazard ratio                 | P                |
| Agatston CACS (Agatston Units) | 19 [0 to 217] | 336 [62 to 1064] | <b>1.23 (1.13 to 1.35) *</b> | <b>&lt;0.001</b> |
| Obstructive disease            | 430 (25%)     | 22 (54%)         | <b>3.35 (1.81 to 6.19)</b>   | <b>&lt;0.001</b> |
| Cardiovascular risk score (%)  | 18 ± 11       | 22 ± 12          | 1.03 (1.00 to 1.05)          | 0.024            |

Hazard ratio (95% confidence interval). Median [Interquartile range]

\* Per doubling

CACS, coronary artery calcium score.

*Supplemental Table 3: Multivariable models for the primary end-point of fatal or non-fatal myocardial infarction.*

|         |                                 | <b>Hazard ratio</b>        | <b>P</b>     |
|---------|---------------------------------|----------------------------|--------------|
| Model 1 | Plaque burden *                 | 1.23 (0.95 to 1.60)        | 0.119        |
|         | Agatston CACS *                 | 1.12 (0.98 to 1.27)        | 0.089        |
|         | Obstructive disease †           | 1.37 (0.66 to 2.84)        | 0.398        |
|         | Cardiovascular risk score       | 1.00 (0.98 to 1.03)        | 0.828        |
| Model 2 | Non-calcified plaque burden *   | 1.21 (0.94 to 1.56)        | 0.140        |
|         | Agatston CACS *                 | 1.13 (1.00 to 1.28)        | 0.056        |
|         | Obstructive disease †           | 1.37 (0.66 to 2.84)        | 0.396        |
|         | Cardiovascular risk score       | 1.00 (0.98 to 1.03)        | 0.831        |
| Model 3 | Low-attenuation plaque burden * | <b>1.60 (1.10 to 2.34)</b> | <b>0.014</b> |
|         | Agatston CACS *                 | <b>1.13 (1.01 to 1.27)</b> | <b>0.041</b> |
|         | Obstructive disease †           | 1.20 (0.58 to 2.48)        | 0.621        |
|         | Cardiovascular risk score       | 1.00 (0.98 to 1.03)        | 0.821        |
| Model 4 | Calcified plaque burden *       | 1.42 (0.90 to 2.25)        | 0.133        |
|         | Agatston CACS *                 | 1.06 (0.88 to 1.28)        | 0.549        |
|         | Obstructive disease †           | 1.39 (0.64 to 3.01)        | 0.400        |
|         | Cardiovascular risk score       | 1.01 (0.98 to 1.04)        | 0.694        |
| Model 5 | Plaque burden *                 | 0.38 (0.01 to 18.92)       | 0.629        |
|         | Non-calcified plaque burden *   | 2.02 (0.04 to 94.24)       | 0.720        |
|         | Low-attenuation plaque burden * | <b>2.25 (1.17 to 4.34)</b> | <b>0.015</b> |
|         | Calcified plaque burden *       | <b>1.78 (1.02 to 3.10)</b> | <b>0.042</b> |
| Model 6 | Plaque burden *                 | 0.39 (0.01 to 21.9)        | 0.645        |
|         | Non-calcified plaque burden *   | 2.01 (0.04 to 109.7)       | 0.732        |
|         | Low-attenuation plaque burden * | <b>2.22 (1.13 to 4.35)</b> | <b>0.020</b> |
|         | Calcified plaque burden *       | 1.79 (0.85 to 3.77)        | 0.126        |
|         | Agatston CACS *                 | 0.98 (0.80 to 1.21)        | 0.881        |
|         | Obstructive disease †           | 1.10 (0.52 to 2.32)        | 0.802        |
|         | Cardiovascular risk score       | 1.01 (0.98 to 1.03)        | 0.702        |

Hazard ratio (95% confidence interval).

\* Per doubling.

† Presence of obstructive coronary artery disease on visual assessment  
CACS, coronary artery calcium score.

*Supplemental Table 4: Univariable analysis for plaque subtypes and the primary end-point of fatal or non-fatal myocardial infarction compared to patients with normal coronary arteries.*

|                                            | <b>Hazard ratio</b>          | <b>P</b>         |
|--------------------------------------------|------------------------------|------------------|
| Non-obstructive disease with LA plaque <4% | 1.33 (0.14 to 12.77)         | 0.806            |
| Non-obstructive disease with LA plaque >4% | <b>6.61 (1.91 to 22.82)</b>  | <b>0.003</b>     |
| Obstructive disease                        | <b>10.56 (3.16 to 35.30)</b> | <b>&lt;0.001</b> |

LA, low-attenuation non-calcified plaque.

## Supplemental Figures and Figure Legends

*Supplemental Figure 1: Cumulative incidence of fatal or non-fatal myocardial infarction (MI) in patients with normal coronary arteries, obstructive coronary artery disease, and non-obstructive coronary artery disease with and without low-attenuation non-calcified plaque burden above 4%.*

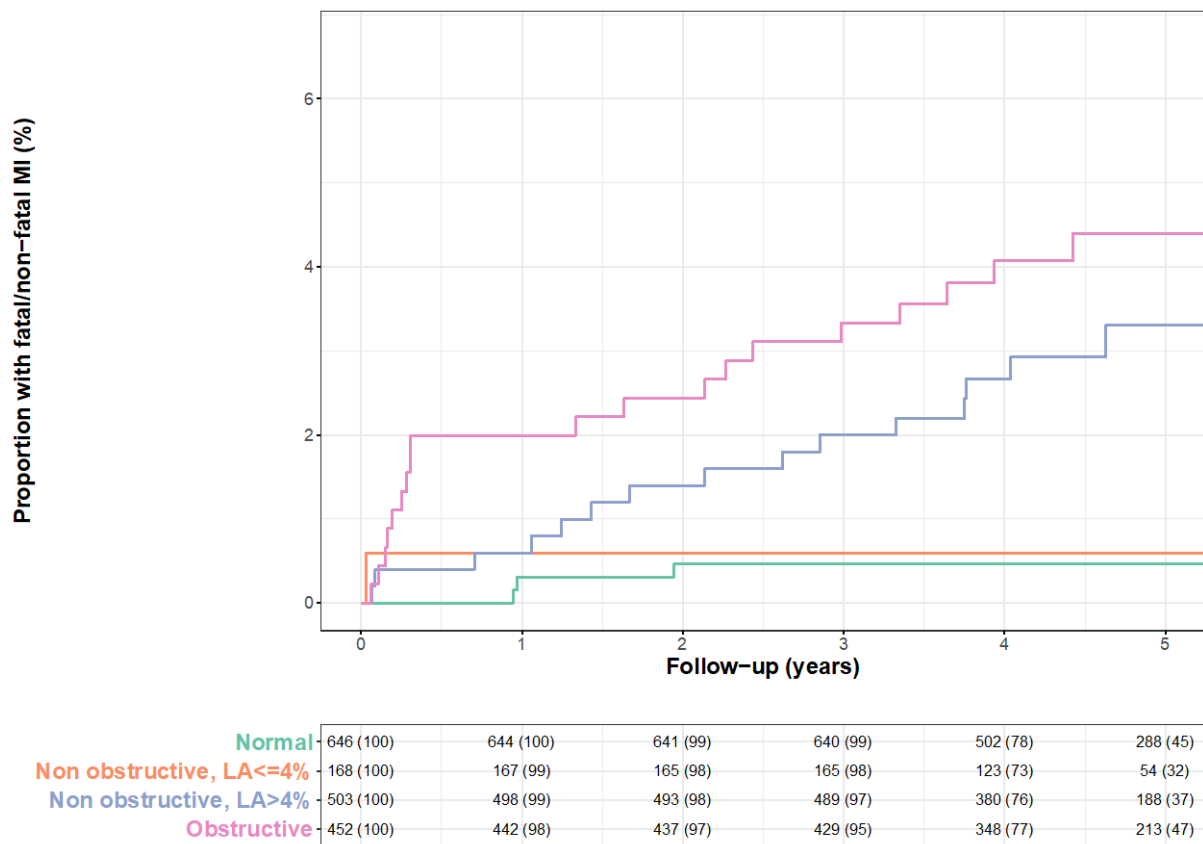

LA, low attenuation non-calcified plaque; MI, myocardial infarction.

Supplemental Figure 2: Cumulative incidence of fatal or non-fatal myocardial infarction in patients with no low-attenuation plaque and low-attenuation plaque burden above 4%.

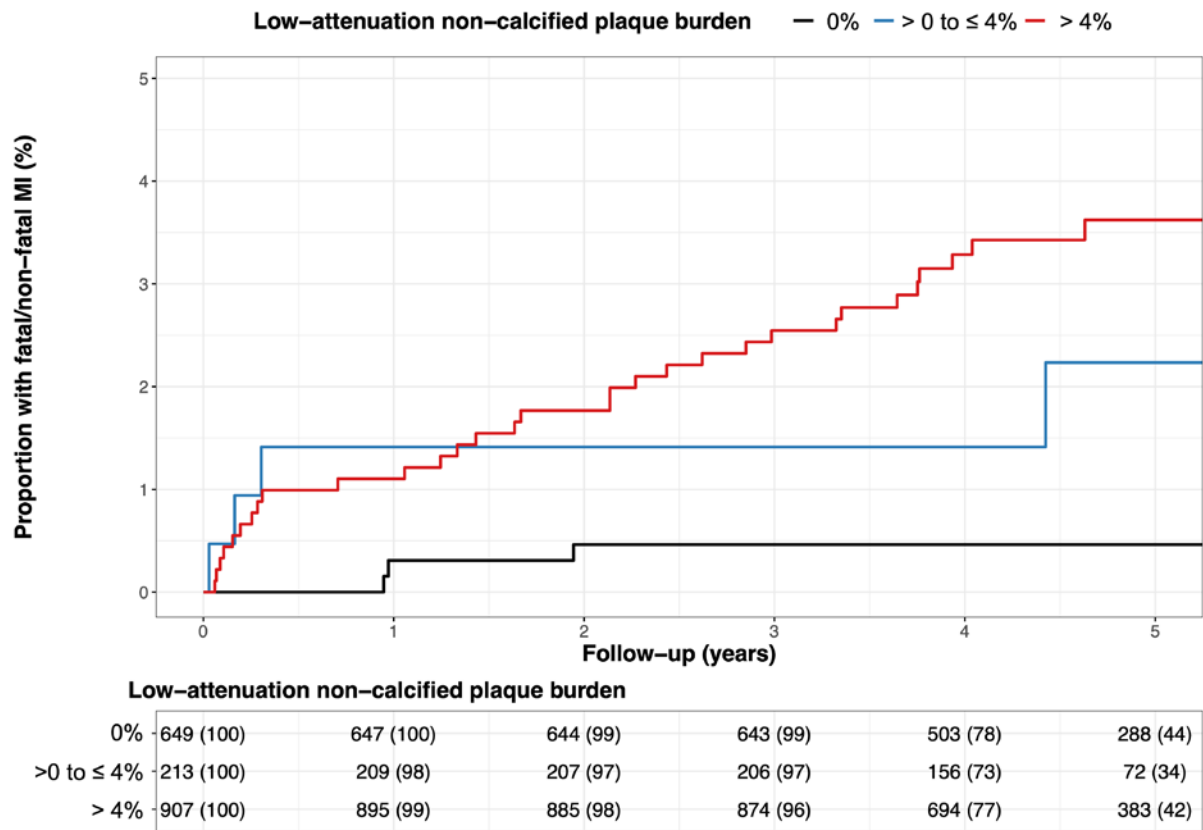

MI, myocardial infarction.
